# Supplementary material for: A palmitoylation code controls PI4KIIIα complex formation and PI(4,5)P2 homeostasis at the plasma membrane
Source: Oxford University Press journal article supplement (doi:10.1242/jcs.259365), 2021-09-27
Supplement: jcs259365supp.pdf [file jcs259365supp.pdf]

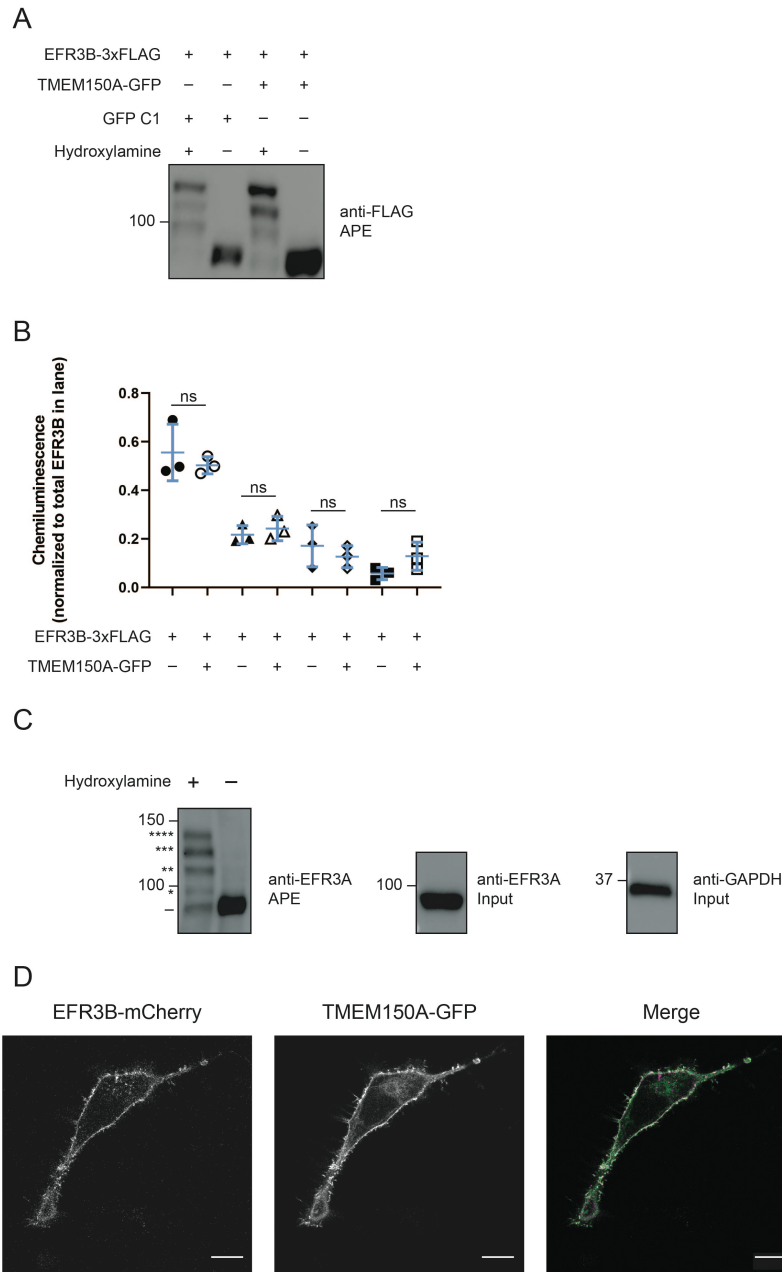

**Fig. S1. Overexpression of TMEM150A does not alter the palmitoylation state of EFR3B.**

(A) Representative Western blot of acyl-PEG exchange (APE) experiments in which EFR3B was co-expressed with TMEM150A-GFP or with a GFP-C1 empty vector. (B) Quantification of three biological replicates of the experiment shown in (A), showing that co-expression of TMEM150A with EFR3B has no effect on its palmitoylation. (C) Endogenous EFR3A exists as a mixture of quadruply, triply, and doubly palmitoylated forms. Western blot for endogenous EFR3A after an APE assay, showing that endogenous EFR3A is heavily palmitoylated. The number of asterisks to indicates the number of palmitoyl groups on EFR3A, and – denotes the non-palmitoylated form. (D) Representative image of a cell overexpressing EFR3B-mCherry (left) and TMEM150A-GFP (middle) and a merged image (right). Scale bars, 15  $\mu$ m. Statistical significance was assessed using Student's t-test. n=3; ns, not significant.

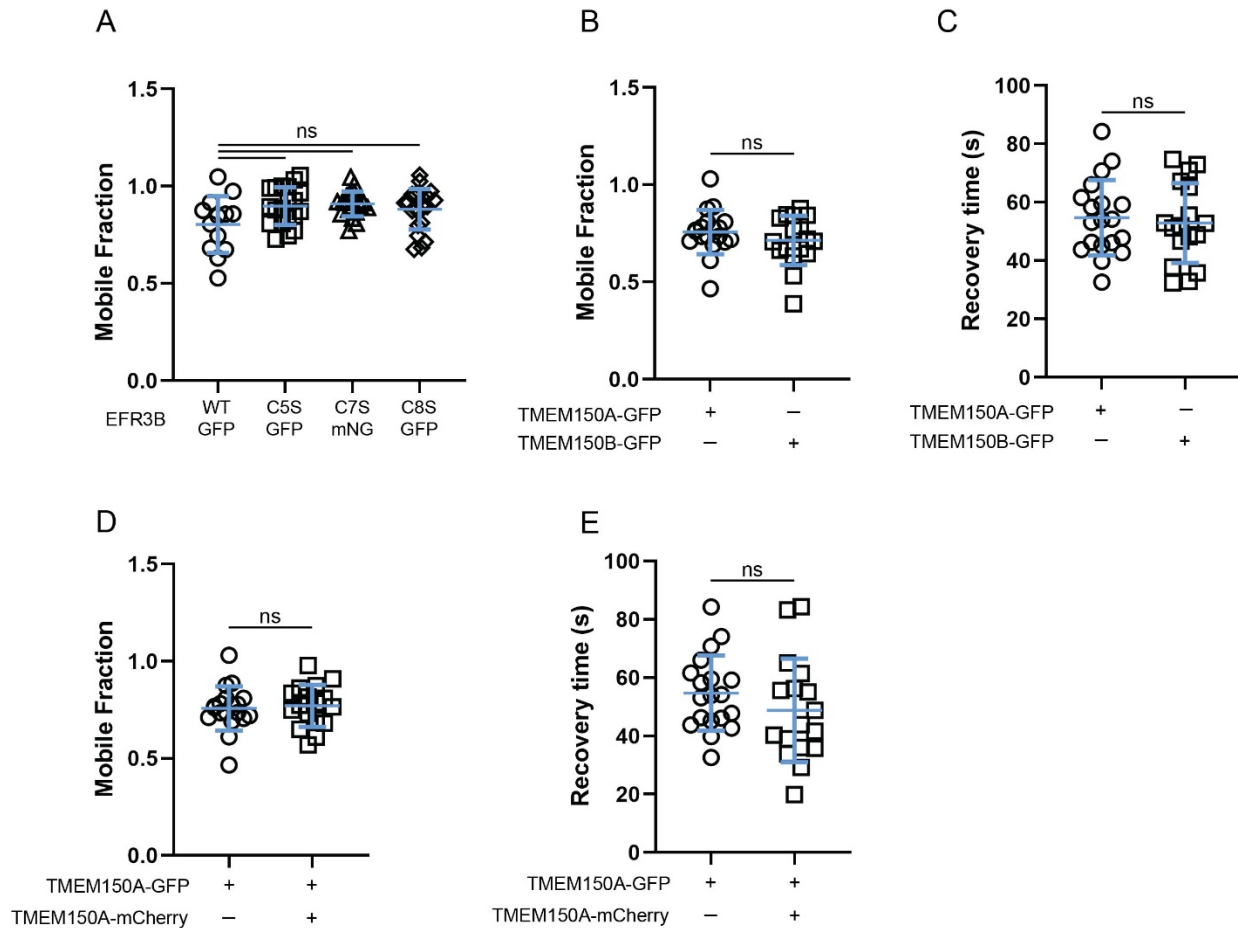

**Fig. S2. The mobile fractions of WT and CxS EFR3B are the same.** (A) Mobile fractions (mean  $\pm$  SD) of the indicated EFR3B-GFP (or, for C7S, -mNG) construct, measured by FRAP. Note that EFR3B(C7S)-mNG was used due to undesired clustering of EFR3B(C7S)-GFP.  $n=13-22$ ; ns, not significant. (B) The mobile fraction (mean  $\pm$  SD) of TMEM150A-GFP and TMEM150B-GFP, measured by FRAP. (C) The recovery times ( $t_{1/2}$ , mean  $\pm$  SD) of TMEM150A-GFP and TMEM150B-GFP, measured by FRAP.  $n=17-19$ ; ns, not significant. (D) Mobile fractions (mean  $\pm$  SD) of TMEM150A-GFP when expressed alone or together with additional amounts of TMEM150A-mCherry. (E) Recovery times ( $t_{1/2}$ , mean  $\pm$  SD) of TMEM150A-GFP when expressed alone or together with TMEM150A-mCherry. Note that overexpression of TMEM150A-mCherry does not influence the mobile fraction or diffusion of TMEM150A-GFP, suggesting that substantial oligomerization does not occur by increased amount of TMEM150A, as might be expected by mass action.  $n=14-17$ ; ns, not significant.

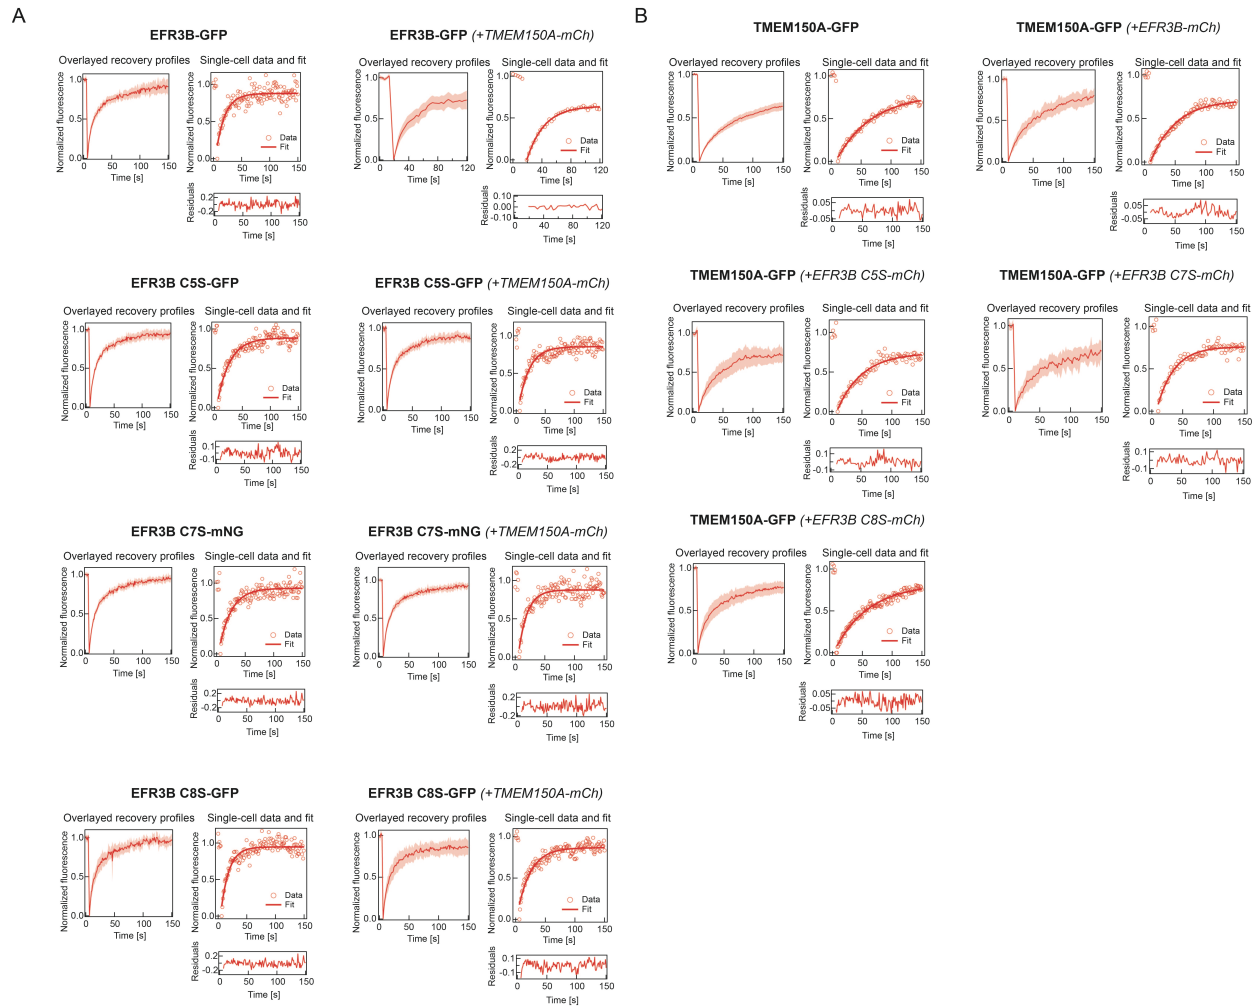

**Fig. S3. FRAP data follow a single-exponential recovery curve.** (A) FRAP recovery profiles, single-exponential fit, residuals and single-cell representative data are shown for FRAP experiments involving GFP-tagged EFR3B (WT, CxS mutants) in the absence or presence of TMEM150A-mCh. (B) FRAP recovery profiles, single-exponential fit, residuals and single-cell representative data are shown for FRAP experiments involving GFP-tagged TMEM150A in the absence or presence of EFR3B-mCh (WT, CxS mutants).

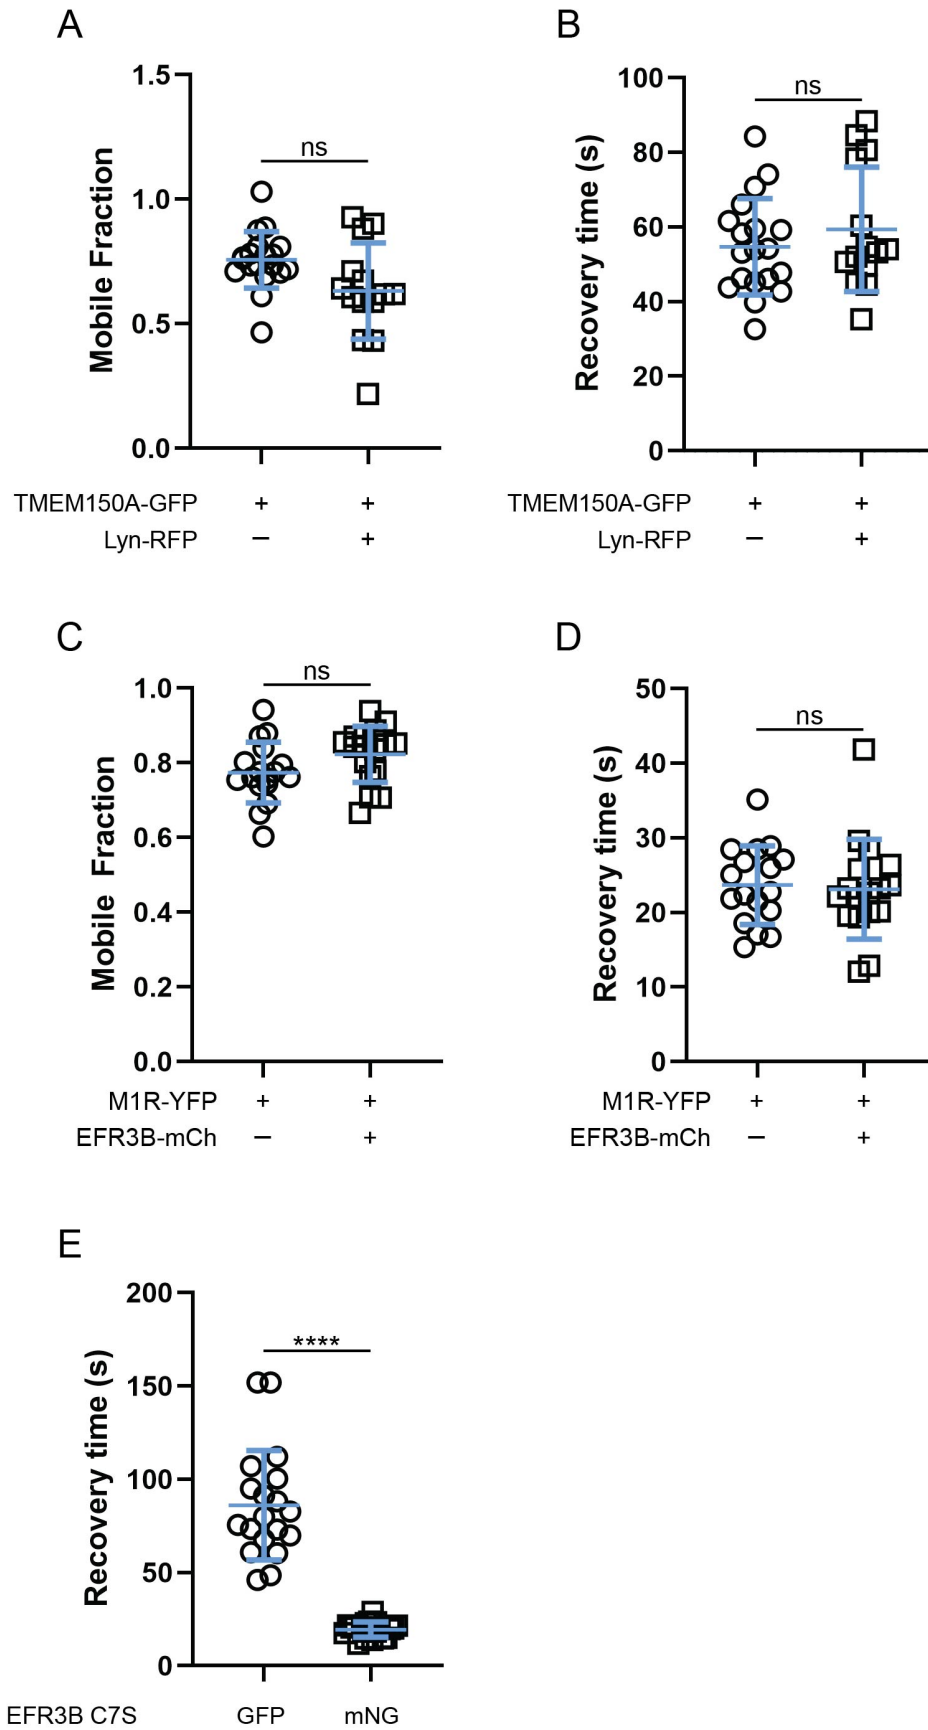

**Fig. S4. TMEM150A-GFP does not engage in nonspecific interactions with Lyn, a different palmitoylated protein than EFR3B.** (A) Mobile fractions (mean  $\pm$  SD) of TMEM150A-GFP when expressed alone or in presence of Lyn-RFP, a model palmitoylated and myristoylated membrane anchor. (B) Recovery times ( $t_{1/2}$ , mean  $\pm$  SD) for TMEM150A-GFP in the presence of absence of Lyn-RFP. The mobile fraction and recovery time of TMEM150A are not influenced by the presence of Lyn-RFP, indicating that the diffusion properties of TMEM150A as measured by FRAP are not sensitive to overexpression of a palmitoylated protein unrelated to the PI4KIII $\alpha$  complex. n=14–19; ns, not significant. (C) The mobile fraction (mean  $\pm$  SD) of M1R-YFP in the presence of absence of EFR3B-mCherry measured by FRAP. (D) The recovery time ( $t_{1/2}$ , mean  $\pm$  SD) of M1R-YFP in the presence and absence of EFR3B-mCherry measured by FRAP. Note that the mobile fraction and recovery time of M1R-YFP is not modified by the overexpression of EFR3B, suggesting that the effect of EFR3B on TMEM150A diffusion is specific. n=17; ns, not significant. (E) Recovery times (mean  $\pm$  SD) of EFR3B(C7S)-GFP and EFR3B(C7S)-mNG, measured by FRAP. Note that the GFP-tagged construct, which forms clusters visible by confocal microscopy, exhibits much slower diffusion. By contrast, the mNG construct, which does not exhibit such clustering, results in diffusion properties similar to the other GFP-tagged CxS mutants (see Fig. 2E). n=19–20; \*\*\*\*,  $p < 0.001$

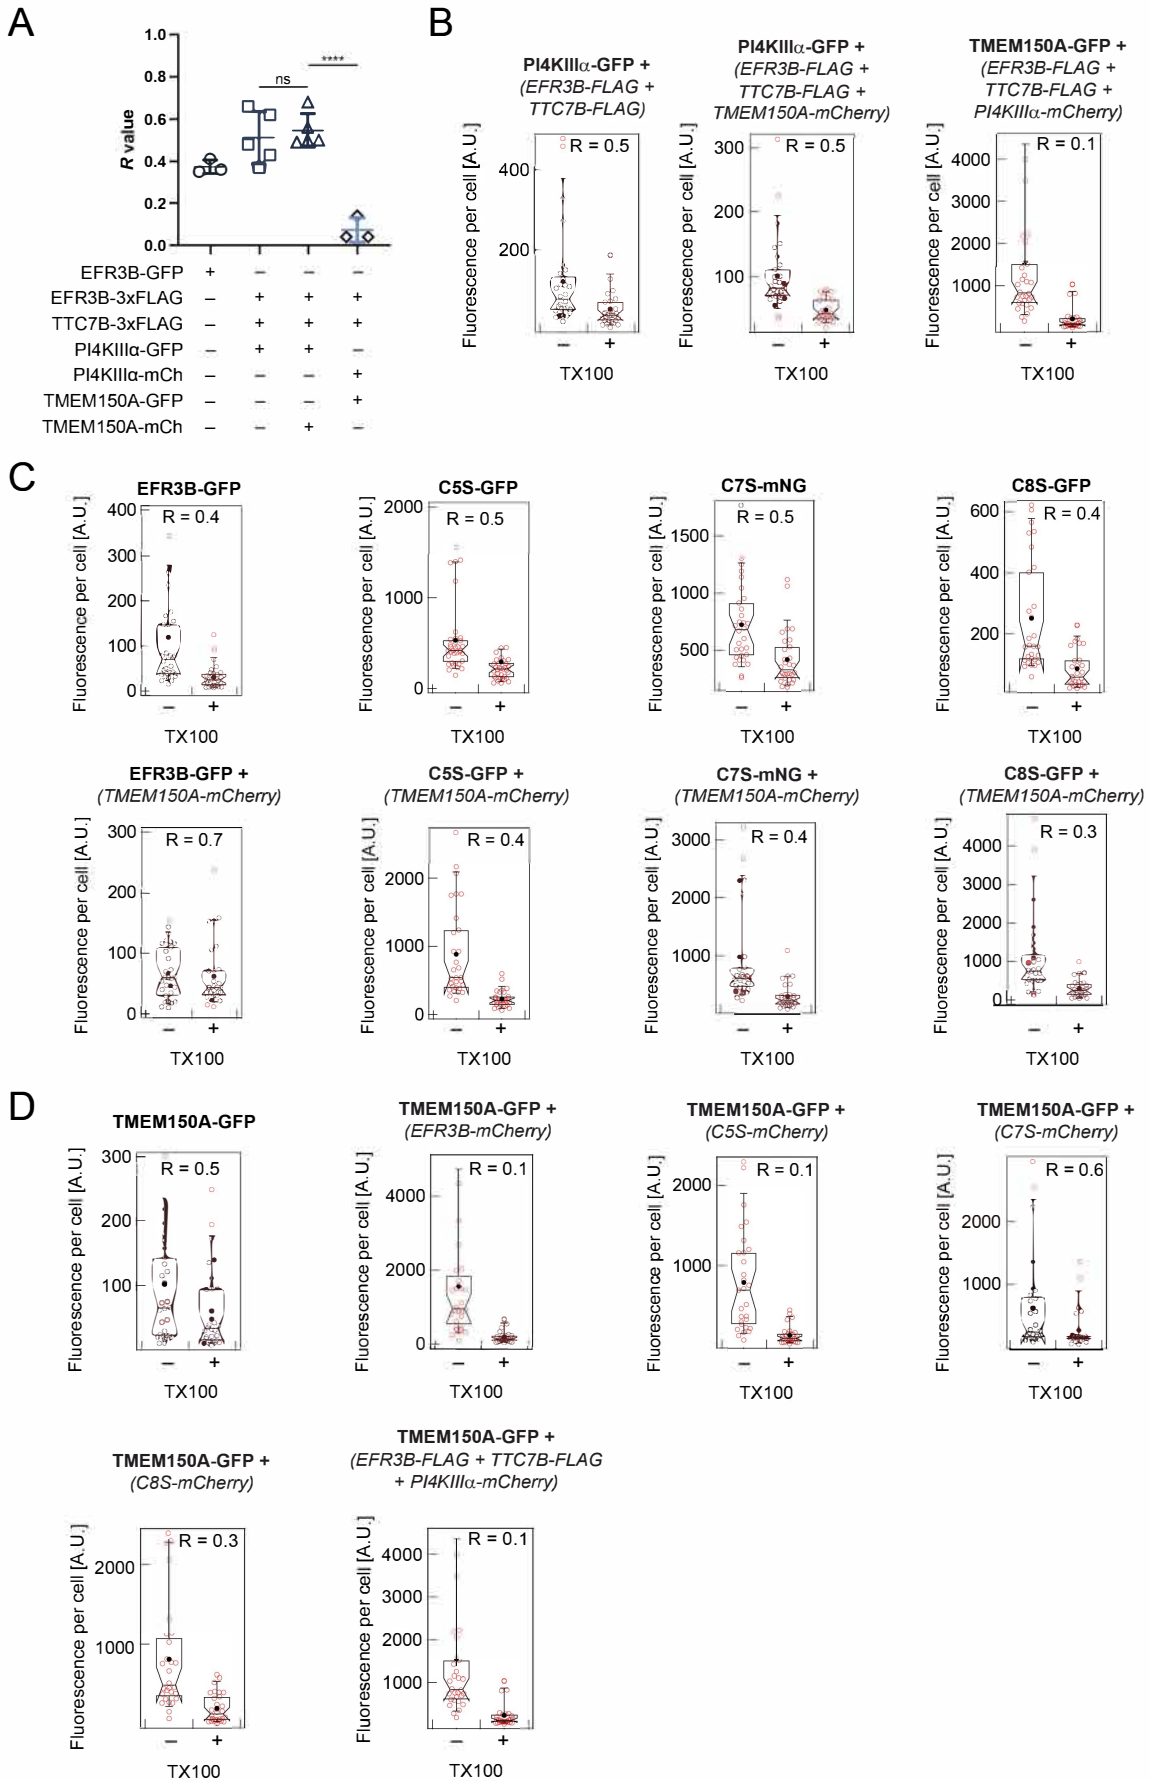

**Fig. S5. The TTC7B-containing Complex I and TMEM150A-containing Complex II co-exist in the PM.** (A) *R* values (mean  $\pm$  SD) from iDRM assays showing the fraction of retained GFP fluorescence from RBL-2H3 cells expressing the indicated combination of constructs, after a mild wash with 0.04% TX-100. Lane 1: EFR3B-GFP is moderately detergent resistant when expressed alone. Lanes 2–3: PI4KIII $\alpha$  is highly detergent resistant in both the TTC7B-containing Complex I (lane 2) and TMEM150A-containing Complex II (lane 3). Lane 4: TMEM150A is highly sensitive to detergent even when Complex II is formed.  $n=3-5$ ; \*\*\*\*,  $p<0.001$ ; ns, not significant. (B) Mean fluorescence values of representative cells expressing the indicated constructs (*R* values shown in panel A) after TX-100 treatment or control treatment. (C-D) Mean fluorescence values of representative cells expressing EFR3B WT or CxS-GFP (C) or TMEM150A-GFP (D) with additional indicated constructs after TX-100 or control treatment.

**Table S1. Sources of reagents, primers, antibodies, and plasmids.**

| <b>Reagents</b>                                | <b>Source</b>            | <b>Catalog number</b> |
|------------------------------------------------|--------------------------|-----------------------|
| DMEM                                           | Corning                  | 10-017-CV             |
| FBS                                            | VWR                      | 45000-734             |
| Dialyzed FBS                                   | VWR                      | 97065-302             |
| Penicillin/Streptomycin                        | VWR                      | 45000-652             |
| Gentamicin                                     | Thermo Fisher            | 15750078              |
| Transfectagro                                  | VWR                      | 71002-816             |
| Lipofectamine 2000                             | Invitrogen               | 11668019              |
| cOmplete protease inhibitor                    | Millipore Sigma          | 5056489001            |
| Fugene                                         | Promega                  | E2312                 |
| Phorbol 12,13-dibutyrate (PDB)                 | Sigma-Aldrich            | P1269                 |
| BCA assay                                      | Pierce                   | 23225                 |
| TCEP hydrochloride                             | Cayman Chemical Company  | 14329                 |
| N-ethylmaleimide                               | Alfa Aesar               | 40526                 |
| Hydroxylamine                                  | Allied Chemical          | 1789                  |
| Methoxypolyethylene glycol maleimide (5 kDa)   | Sigma-Aldrich            | 63187                 |
| Lactacystin                                    | Santa Cruz Biotechnology | sc-3575               |
| Cycloheximide                                  | Amresco                  | 94271                 |
| Ezview Red Anti-FLAG M2 Affinity beads         | Sigma-Aldrich            | F2426                 |
| 17-Octadecynoic acid (alk-16)                  | Cayman Chemical Company  | 90270                 |
| Cy5.5 azide                                    | Click Chemistry Tools    | 1059-1                |
| THPTA (tris-hydroxypropyltriazolylmethylamine) | Click Chemistry Tools    | 1010                  |
| Sodium L-ascorbate                             | Chem Impex               | 01436                 |
| Cupric sulfate                                 | Mallinckrodt             | 4844                  |
| Clarity ECL reagent                            | Bio-Rad                  | 1705061               |
| Oxotremorine M                                 | Santa Cruz               | Sc-203656             |



|                                                |                          |            |
|------------------------------------------------|--------------------------|------------|
|                                                |                          |            |
| DMEM                                           | Corning                  | 10-017-CV  |
| FBS                                            | VWR                      | 45000-734  |
| Dialyzed FBS                                   | VWR                      | 97065-302  |
| Penicillin/Streptomycin                        | VWR                      | 45000-652  |
| Gentamicin                                     | Thermo Fisher            | 15750078   |
| Transfectagro                                  | VWR                      | 71002-816  |
| Lipofectamine 2000                             | Invitrogen               | 11668019   |
| cOmplete protease inhibitor                    | Millipore Sigma          | 5056489001 |
| Fugene                                         | Promega                  | E2312      |
| Phorbol 12,13-dibutyrate (PDB)                 | Sigma-Aldrich            | P1269      |
| BCA assay                                      | Pierce                   | 23225      |
| TCEP hydrochloride                             | Cayman Chemical Company  | 14329      |
| N-ethylmaleimide                               | Alfa Aesar               | 40526      |
| Hydroxylamine                                  | Allied Chemical          | 1789       |
| Methoxypolyethylene glycol maleimide (5 kDa)   | Sigma-Aldrich            | 63187      |
| Lactacystin                                    | Santa Cruz Biotechnology | sc-3575    |
| Cycloheximide                                  | Amresco                  | 94271      |
| Ezview Red Anti-FLAG M2 Affinity beads         | Sigma-Aldrich            | F2426      |
| 17-Octadecynoic acid (alk-16)                  | Cayman Chemical Company  | 90270      |
| Cy5.5 azide                                    | Click Chemistry Tools    | 1059-1     |
| THPTA (tris-hydroxypropyltriazolylmethylamine) | Click Chemistry Tools    | 1010       |
| Sodium L-ascorbate                             | Chem Impex               | 01436      |
| Cupric sulfate                                 | Mallinckrodt             | 4844       |
| Clarity ECL reagent                            | Bio-Rad                  | 1705061    |
| Oxotremorine M                                 | Santa Cruz               | Sc-203656  |

|                               |                                 |                                                                                                           |
|-------------------------------|---------------------------------|-----------------------------------------------------------------------------------------------------------|
| Atropine                      | TCI                             | A0550                                                                                                     |
|                               |                                 |                                                                                                           |
| <b>Primers</b>                | <b>Source</b>                   | <b>Sequence</b>                                                                                           |
| EFR3B C5S-3xFLAG              | IDT                             | 5'-agggcaccgcagcagccagacacaccgtac-3'<br>5'-gtacgggtgtgtctggctgctgagggtgcct-3'                             |
| EFR3B C7S-3xFLAG              | IDT                             | 5'-ggtgtgtgtggcagctgagggtgccc-3'<br>5'-gggcaccgcagctgccacacacacc-3'                                       |
| EFR3B C8S-3xFLAG              | IDT                             | 5'-gtgtgtggctgcagcgggtgccttc-3'<br>5'-gaagggcaccgctgcagccacacac-3'                                        |
| EFR3B C5,7S-3xFLAG            | IDT                             | 5'-tgtgtctggctcctgcgggtgccttc-3'<br>5'-gaagggcaccgcaggagccagacaca-3'                                      |
| EFR3B C5,8S-3xFLAG            | IDT                             | 5'-tgtgtctggctcctgcgggtgccttc-3'<br>5'-agggcaccggagcagccagacacac-3'                                       |
| EFR3B C7,8S-3xFLAG            | IDT                             | 5'-ggtgtgtgtggcagcagcgggtgccttc-3'<br>5'-gaagggcaccgctgctgccacacacacc-3'                                  |
| EFR3B C5S-GFP/mCherry         | Eurofins<br>Genomics<br>IDT     | 5'-catgtacgggtgtgagtggctgctcgg-3'<br>5'-<br>agaggtaccgagtatacacagatcaggaaactcatctcat<br>agac-3'           |
| EFR3B C7S-GFP/mCherry         | IDT                             | 5'-cagagaattcaccatgtacgggtgtgtggctcctgc-3'<br>5'-<br>agaggtaccgagtatacacagatcaggaaactcatctcat<br>agac-3'  |
| EFR3B C8S-GFP/mCherry         | IDT                             | 5'-cagagaattcaccatgtacgggtgtgtggctgctccg-3'<br>5'-<br>agaggtaccgagtatacacagatcaggaaactcatctcat<br>agac-3' |
| EFR3B C5,7,8S-GFP/mCherry     | Eurofins<br>Genomics            | 5'-cgaagggcaccgctgctgccactcacaccgtacatg-3'<br>5'-catgtacgggtgtgagtggcagcagcgggtgccttcg-3'                 |
| M1R-3xFLAG                    | Eurofins<br>Genomics            | 5'-<br>aagcggccgcagccaccatgaacacctcagtccccctgc-<br>3'<br>5'-actagaatccgcattggcgggaggggggtgc-3'            |
|                               |                                 |                                                                                                           |
| <b>Antibodies</b>             | <b>Source</b>                   | <b>Catalog number</b>                                                                                     |
| Rabbit anti-FLAG polyclonal   | Sigma-Aldrich                   | F7425                                                                                                     |
| Mouse anti-FLAG M2 monoclonal | Millipore Sigma                 | F1804                                                                                                     |
| Anti-GFP                      | Takara                          | 632375                                                                                                    |
| Anti-GAPDH                    | Genetex                         | GTX78213                                                                                                  |
| Anti-Calnexin                 | Abcam                           | Ab22595                                                                                                   |
| Anti-rabbit-HRP               | Bio-Rad                         | 1706515                                                                                                   |
| Anti-mouse-HRP                | Bio-Rad                         | 1706516                                                                                                   |
|                               |                                 |                                                                                                           |
| <b>Plasmids</b>               | <b>Source</b>                   |                                                                                                           |
| EFR3B-3xFLAG                  | Gift from the De<br>Camilli lab |                                                                                                           |
| EFR3B C5S-3xFLAG              | This paper                      |                                                                                                           |
| EFR3B C7S-3xFLAG              | This paper                      |                                                                                                           |

|                        |                              |  |
|------------------------|------------------------------|--|
| EFR3B C8S-3xFLAG       | This paper                   |  |
| EFR3B C5,7S-3xFLAG     | This paper                   |  |
| EFR3B C5,8S-3xFLAG     | This paper                   |  |
| EFR3B C7,8S-3xFLAG     | This paper                   |  |
| EFR3B C5S-GFP          | This paper                   |  |
| EFR3B C7S-GFP          | This paper                   |  |
| EFR3B C7S-mNeonGreen   | This paper                   |  |
| EFR3B C8S-GFP          | This paper                   |  |
| EFR3B C5,7S-GFP        | This paper                   |  |
| EFR3B C5,8S-GFP        | This paper                   |  |
| EFR3B C7,8S-GFP        | This paper                   |  |
| EFR3B C5,7,8S-tdTomato | Gift from the De Camilli lab |  |
| EFR3B C5,7,8S-GFP      | This paper                   |  |
| EFR3B C5,7,8S-3xFLAG   | This paper                   |  |
| TMEM150A-GFP           | Gift from the De Camilli lab |  |
| TMEM150A-mCherry       | This paper                   |  |
| TTC7B-mCh              | Gift from the De Camilli lab |  |
| GFP-PI4KIII $\alpha$   | Gift from the De Camilli lab |  |
| iRFP-PH(PLC $\delta$ ) | Gift from the De Camilli lab |  |
| M1R-YFP                | Gift from the De Camilli lab |  |
| M1R-3xFLAG             | This paper                   |  |
